# Supplementary material for: Vocal correlates of individual sooty mangabey travel speed and direction
Source: PubMed Central journal article supplement (PMC4987050; doi:10.7717/peerj.2298), 2016-07-28
Supplement: peerj-04-2298-s002.pdf [file peerj-04-2298-s002.pdf]

# Data sets and replication code for ‘Vocal regulation of individual sooty mangabey travel speed and direction’

*Christof Neumann & Klaus Zuberbühler*

## Data sets

The data for the four models tested in the manuscript are in four separate .csv files. The models are described below in separate sections and refer to:

- (1) current speed (dataset1.csv)
- (2) future speed (dataset2.csv)
- (3) current direction changes (dataset3.csv)
- (4) future direction changes (dataset4.csv)

The following variables appear in the data sets:

- `speed` and `controlspeed`: speed of focal individual in a given time block, `controlspeed` is the control variable for the future speed model
- `cp` and `controlcp`: whether or not focal individual’s track contained a change point in a given time block, `controlcp` is the control variable for the future speed model
- `subgr.grunt`, `subgr.twitter`, `subgr.other`: vocal rates of mangabeys in the soundscape, i.e. subgroup vocal rates
- `subgr.size`: average number of individuals within 10m during a given time block
- `focal`: two letter code of focal individual
- `focal.grunt` and `focal.other`: whether or not focal produced a vocalization in a given time block
- `asso`: number of associated species
- `otherspec`: vocal rate of non-mangabeys
- `year`, `month`, `day`, `hour`, `minute`, `dt`: time and date of observation
- `sex`: sex of focal individual (male=1, female=0)
- `ac`: auto-correlation term
- `act.fefo`, `act.trvl` and `act.soc`: activity descriptor for each time block (see manuscript for definitions)

```
# packages used to calculate models:  
library(lme4); library(effects); library(optimx)
```

```
## Loading required package: Matrix
```

```
packageVersion("lme4")
```

```
## [1] '1.1.11'
```

## Model 1 - current speed (dataset1.csv)

```
xdata <- read.csv("dataset1.csv")

full <- lmer(speed ~ subgr.size*(focal.grunt +focal.other +subgr.twit +subgr.grunt +subgr.other)
             +asso*otherspec +sex +ac +(1|focal) +(1|dt), data=xdata, REML = F)
null <- lmer(speed ~ ac +sex +(1|focal) +(1|dt), data=xdata, REML = F)
anova(null, full)

## Data: xdata
## Models:
## null: speed ~ ac + sex + (1 | focal) + (1 | dt)
## full: speed ~ subgr.size * (focal.grunt + focal.other + subgr.twit +
## full:      subgr.grunt + subgr.other) + asso * otherspec + sex + ac +
## full:      (1 | focal) + (1 | dt)
##      Df    AIC    BIC logLik deviance Chisq Chi Df Pr(>Chisq)
## null  6 407.72 426.71 -197.86   395.72
## full 20 399.13 462.42 -179.56   359.13 36.592    14 0.0008501 ***
## ---
## Signif. codes:  0 '***' 0.001 '**' 0.01 '*' 0.05 '.' 0.1 ' ' 1

final <- lmer(speed ~ subgr.size*subgr.other +focal.grunt +focal.other +subgr.twit +subgr.grunt
              +asso*otherspec +sex +ac +(1|focal) +(1|dt), data=xdata, REML = F)
coefficients(summary(final))
```

```
##              Estimate Std. Error    t value
## (Intercept)   -0.312211050  1.27302033  -0.24525221
## subgr.size    -0.047697429  0.04807726  -0.99209961
## subgr.other    0.099798659  0.04615938   2.16204493
## focal.gruntyes -0.142383359  0.10688397  -1.33213011
## focal.othereyes -0.049201135  0.13243075  -0.37152350
## subgr.twit    -0.108497350  0.05056477  -2.14571051
## subgr.grunt   -0.067842967  0.04905056  -1.38312319
## asso          -0.004567669  0.07721705  -0.05915363
## otherspec     -0.028871499  0.05483565  -0.52650965
## sex           3.990966336  2.27482769   1.75440380
## ac            -2.610533827  0.14123631 -18.48344719
## subgr.size:subgr.other -0.139770046  0.04099140  -3.40974054
## asso:otherspec  0.100627101  0.04977928   2.02146566
```

## Model 2 - future speed (dataset2.csv)

```
xdata <- read.csv("dataset2.csv")

full <- lmer(speed ~ subgr.size*(focal.grunt +focal.other +subgr.twit +subgr.grunt +subgr.other)
             +asso*otherspec +sex +ac +controlspeed +(1|focal) +(1|dt), data=xdata, REML = F)
null <- lmer(speed ~ ac +sex +controlspeed +(1|focal) +(1|dt), data=xdata, REML = F)
anova(null, full)

## Data: xdata
```

```

## Models:
## null: speed ~ ac + sex + controlspeed + (1 | focal) + (1 | dt)
## full: speed ~ subgr.size * (focal.grunt + focal.other + subgr.twit +
## full:      subgr.grunt + subgr.other) + asso * otherspec + sex + ac +
## full:      controlspeed + (1 | focal) + (1 | dt)
##      Df    AIC    BIC logLik deviance  Chisq Chi Df Pr(>Chisq)
## null  7 394.32 415.57 -190.16   380.32
## full 21 395.72 459.49 -176.86   353.72 26.599   14   0.0217 *
## ---
## Signif. codes:  0 '***' 0.001 '**' 0.01 '*' 0.05 '.' 0.1 ' ' 1

final <- lmer(speed ~ subgr.size*subgr.grunt +focal.grunt +focal.other +subgr.twit +subgr.other
              +asso +otherspec +sex +ac +controlspeed +(1|focal) +(1|dt), data=xdata, REML = F)
coefficients(summary(final))

```

```

##              Estimate Std. Error    t value
## (Intercept)    0.19609079 0.69488197    0.2821929
## subgr.size     -0.03389037 0.06386307   -0.5306725
## subgr.grunt    0.14762172 0.06246476    2.3632801
## focal.gruntyes -0.10652299 0.14321001   -0.7438236
## focal.othersyes -0.27995277 0.16943302   -1.6522917
## subgr.twit     -0.02617477 0.06439339   -0.4064822
## subgr.other    -0.15376936 0.06157040   -2.4974558
## asso           -0.05065415 0.10364668   -0.4887194
## otherspec      -0.01415996 0.06806551   -0.2080343
## sex            0.52446698 1.24220762    0.4222056
## ac             -1.60360912 0.12749602  -12.5777192
## controlspeed   0.01846482 0.05676961    0.3252589
## subgr.size:subgr.grunt -0.13027353 0.05545413   -2.3492124

```

## Model 3 - current change points (dataset3.csv)

```

xdata <- read.csv("dataset3.csv")

full <- glmer(cp ~ subgr.size*(focal.grunt +focal.other +subgr.twit +subgr.grunt +subgr.other)
              +asso*otherspec +sex +(1|focal) +(1|dt), data=xdata, family = binomial,
              control=glmerControl(optimizer="optimx", optCtrl=list(method="bobyqa")))
null <- glmer(cp ~ sex +(1|focal) +(1|dt), xdata, family = binomial,
              control=glmerControl(optimizer="optimx", optCtrl=list(method="bobyqa")))
anova(null, full)

```

```

## Data: xdata
## Models:
## null: cp ~ sex + (1 | focal) + (1 | dt)
## full: cp ~ subgr.size * (focal.grunt + focal.other + subgr.twit + subgr.grunt +
## full:      subgr.other) + asso * otherspec + sex + (1 | focal) + (1 |
## full:      dt)
##      Df    AIC    BIC logLik deviance  Chisq Chi Df Pr(>Chisq)
## null  4 181.36 194.02 -86.681   173.36
## full 18 189.01 245.97 -76.505   153.01 20.353   14   0.1194

```

```
coefficients(summary(full))
```

```
##              Estimate Std. Error    z value    Pr(>|z|)
## (Intercept)   -1.67885982  0.3435108 -4.88735737 1.021985e-06
## subgr.size    -0.78173686  0.3076331 -2.54113347 1.104937e-02
## focal.gruntyes -0.20234145  0.4916924 -0.41152038 6.806910e-01
## focal.otheryes  0.96938133  0.6487447  1.49424169 1.351125e-01
## subgr.twit     0.14046285  0.2748033  0.51113952 6.092534e-01
## subgr.grunt    0.01363847  0.2591253  0.05263270 9.580246e-01
## subgr.other    0.01841090  0.2499868  0.07364749 9.412909e-01
## asso          -0.14067453  0.3136677 -0.44848262 6.538049e-01
## otherspec     0.31693546  0.2673528  1.18545789 2.358365e-01
## sex           0.04840826  0.6068623  0.07976811 9.364217e-01
## subgr.size:focal.gruntyes 0.21615621  0.6027842  0.35859631 7.198971e-01
## subgr.size:focal.otheryes 2.33960383  1.0421607  2.24495486 2.477103e-02
## subgr.size:subgr.twit   -0.07968328  0.3038457 -0.26224915 7.931294e-01
## subgr.size:subgr.grunt   0.03559487  0.3018382  0.11792699 9.061255e-01
## subgr.size:subgr.other  -0.56020120  0.2830912 -1.97887205 4.783041e-02
## asso:otherspec         0.36081024  0.2042221  1.76675440 7.726937e-02
```

## Model 4 - future change points (dataset4.csv)

```
xdata <- read.csv("dataset4.csv")
```

```
full <- glmer(cp ~ subgr.size*(focal.grunt +focal.other +subgr.twit +subgr.grunt +subgr.other)
              +asso*otherspec +sex +controlcp +(1|focal) +(1|dt), data=xdata, family = binomial,
              control=glmerControl(optimizer="optimx", optCtrl=list(method="bobyqa")))
null <- glmer(cp ~ sex +controlcp +(1|focal) +(1|dt), xdata, family = binomial,
              control=glmerControl(optimizer="optimx", optCtrl=list(method="bobyqa")))
anova(null, full)
```

```
## Data: xdata
## Models:
## null: cp ~ sex + controlcp + (1 | focal) + (1 | dt)
## full: cp ~ subgr.size * (focal.grunt + focal.other + subgr.twit + subgr.grunt +
## full:      subgr.other) + asso * otherspec + sex + controlcp + (1 |
## full:      focal) + (1 | dt)
##      Df    AIC    BIC logLik deviance Chisq Chi Df Pr(>Chisq)
## null  5 164.01 179.19 -77.004   154.01
## full 19 168.64 226.34 -65.321   130.64 23.365    14   0.05458 .
## ---
## Signif. codes:  0 '***' 0.001 '**' 0.01 '*' 0.05 '.' 0.1 ' ' 1
```

```
final <- glmer(cp ~ subgr.size*subgr.other +focal.grunt +focal.other +subgr.twit +subgr.grunt
               +asso +otherspec +sex +controlcp +(1|focal) +(1|dt), data=xdata, family = binomial,
               control=glmerControl(optimizer="optimx", optCtrl=list(method="bobyqa")))
coefficients(summary(final))
```

| ##                        | Estimate    | Std. Error | z value    | Pr(> z )     |
|---------------------------|-------------|------------|------------|--------------|
| ## (Intercept)            | -1.76086336 | 0.3629391  | -4.8516771 | 1.224218e-06 |
| ## subgr.size             | -0.42770543 | 0.2537608  | -1.6854670 | 9.189850e-02 |
| ## subgr.other            | -0.32255335 | 0.2485636  | -1.2976695 | 1.944009e-01 |
| ## focal.gruntyes         | 0.45814579  | 0.4821099  | 0.9502933  | 3.419632e-01 |
| ## focal.otheryes         | 0.49891764  | 0.6349296  | 0.7857843  | 4.319939e-01 |
| ## subgr.twit             | 0.49425701  | 0.2545788  | 1.9414697  | 5.220133e-02 |
| ## subgr.grunt            | -0.09538229 | 0.2409274  | -0.3958964 | 6.921815e-01 |
| ## asso                   | -0.30568344 | 0.2515607  | -1.2151480 | 2.243096e-01 |
| ## otherspec              | -0.02677187 | 0.2277026  | -0.1175738 | 9.064053e-01 |
| ## sex                    | 0.71231229  | 0.6101830  | 1.1673748  | 2.430590e-01 |
| ## controlcp              | 1.31457447  | 0.4759048  | 2.7622634  | 5.740215e-03 |
| ## subgr.size:subgr.other | -0.55925470 | 0.2876415  | -1.9442767 | 5.186210e-02 |
